# Supplementary material
Source: publisher site journal article supplement (https://www.dovepress.com/article/462333)
Supplement: Supplementary file 1 [file get_supplementary_file.php]

**Supplementary Table 1**

Targets of curcumin from TCMSP, STITCH, PharmMapper, ETCM, PubChem and TargetNet database.

| Potassium voltage-gated channel subfamily H member 2 | TCMSP |
| --- | --- |
| Coagulation factor Xa |
| Prostaglandin G/H synthase 2 |
| Heat shock protein HSP 90 |
| mRNA of Protein-tyrosine phosphatase, non-receptor type 1 |

| KCNH2 | PharmMapper |
| --- | --- |
| F7 |
| PTGS2 |
| HSP90AA1 |

| ABCC5 | ETCM |
| --- | --- |
| AR |
| CBR1 |
| GLO1 |
| GSTP1 |
| PPARG |
| SHBG |
| VDR |

| ABCB1 | ATF3 | CCND3 | CTSD | HSD17B2 | PubChem |
| --- | --- | --- | --- | --- | --- |
| ABCC1 | ATF6 | CCNE1 | CXCL1 | HSF1 |
| ABCC2 | ATM | CCPG1 | CXCL12 | HSP90AA1 |
| ABCC4 | ATP2A2 | CD14 | CXCL2 | HSP90B1 |
| ABCC5 | ATP2A3 | CD36 | CXCL8 | HSPA1A |
| ABCG1 | AURKA | CD4 | CYP1B1 | HSPA4 |
| ABCG2 | AURKB | CD40 | CYP3A4 | HSPA5 |
| ABHD5 | B3GALT6 | CD40LG | DYRK2 | HSPB1 |
| ABL1 | BACE1 | CD44 | EGF | HSPD1 |
| ACACA | BAD | CD55 | EGFR | HSPE1 |
| ACHE | BAK1 | CDC14B | EP300 | HTT |
| ACKR3 | BAX | CDC20 | ERBB2 | ICAM1 |
| ADAM17 | BBC3 | CDC25C | ERG | ID1 |
| ADAMTS4 | BCHE | CDH1 | GFAP | ID2 |
| ADCY9 | BCL10 | CDH11 | GMNN | ID3 |
| AGR2 | BCL2 | CDH17 | GPT | IDO1 |
| AHR | BCL2A1 | CDK1 | GSK3B | IFNA1 |
| AK1 | BCL2L1 | CDK2 | GSR | IFNAR1 |
| AKAP6 | BCL2L11 | CDK4 | GSTA4 | IFNAR2 |
| AKT1 | BCL2L2 | CDK5 | GSTK1 | IFNB1 |
| AKT2 | BCL3 | CDK6 | GSTP1 | IFNG |
| ALB | BCOR | CDK7 | H1FX | IFNK |
| ALCAM | BDNF | CDK9 | H2AFX | IFNLR1 |
| ALDH1A1 | BECN1 | CDKN1A | HBS1L | IGF1 |
| ALDOA | BID | CDKN1B | HCK | IGF1R |
| ALDOC | BIRC2 | CDKN2A | HDAC1 | IGF2 |
| ALOX12 | BIRC3 | CFLAR | HDAC11 | IGFBP1 |
| ALOX15B | BIRC5 | CFTR | HDAC2 | IGFBP2 |
| ANG | BIRC7 | CHEK1 | HDAC3 | IGFBP3 |
| ANKRD37 | CASP1 | CHEK2 | HDAC4 | IGFBP4 |
| ANKRD50 | CASP2 | CHUK | HDAC6 | IGFBP5 |
| ANKZF1 | CASP3 | CISD1 | HDAC8 | IGFBP7 |
| ANPEP | CASP4 | CLCN6 | HGF | IGLL1 |
| ANXA5 | CASP7 | COL2A1 | HIF1A | IKBKB |
| APC | CASP8 | COL4A1 | HIST1H2BD | IKBKG |
| APOBEC3F | CASP9 | COL4A5 | HIST1H4F | IL10 |
| APOBEC3G | CAT | CREBBP | HMGCR | IL12A |
| APP | CBR1 | CRP | HMOX1 | IL12B |
| AQP3 | CCAR1 | CSF1 | HNRNPA1 | IL17A |
| AR | CCK | CSF1R | HNRNPD | IL18 |
| ARHGAP30 | CCL2 | CTCFL | HOXB5 | IL1B |
| ARNT | CCNA2 | CTGF | HPGD | IL2 |
| ATF1 | CCNB1 | CTNNB1 | HPGDS | IL4 |
| ATF2 | CCND1 | CTSB | HPRT1 | IL6 |
| INS | LTBR | MYL12A | PubChem | | |
| INSIG2 | MAOA | NFE2L2 |
| INSR | MAOB | NFKB1 |
| IRAK1 | MAP1LC3B | NFKBIA |
| IRAK2 | MAP2K1 | NLRP3 |
| IRF5 | MAP2K2 | NOS2 |
| IRS1 | MAP2K3 | NOTCH1 |
| ITGAM | MAP2K4 | NQO1 |
| ITGB1 | MAP3K1 | PAK1 |
| IVL | MAPK1 | PARP1 |
| JAK2 | MAPK12 | PCNA |
| JAK3 | MAPK14 | PIK3C3 |
| JSRP1 | MAPK3 | PIK3CA |
| JUN | MAPK8 | PIN1 |
| JUNB | MAPK9 | PLIN1 |
| JUND | MAPT | PLIN5 |
| KCNH2 | MCM7 | PPARG |
| KCNMB2 | MDM2 | PRKAA2 |
| KDM1A | MECP2 | PRKCQ |
| KDR | MFI2 | PSMB5 |
| KEAP1 | MFNG | PTEN |
| KLF10 | MGMT | PTGS2 |
| KLF6 | MKI67 | RAPGEF3 |
| KLHL21 | MME | RAPGEF4 |
| KLHL24 | MMP10 | RELA |
| KLK2 | MMP13 | SERPINB10 |
| KLK3 | MMP14 | SETD8 |
| KMT2A | MMP2 | SIRT1 |
| KPNB1 | MMP3 | SNCA |
| KRAS | MMP7 | SNUPN |
| KRTAP2-1 | MMP9 | SOD2 |
| KYNU | MPHOSPH6 | STAT3 |
| LCP2 | MPO | TLR4 |
| LDHB | MRPL1 | TNF |
| LDLR | MS4A1 | TNK1 |
| LIG3 | MSMP | TP53 |
| LIG4 | MSR1 | TSG101 |
| LIN28B | MST1R | TYR |
| LMNA | MTOR | VEGFA |
| LPAR1 | MVD | VIM |
| LRMP | MXD1 | WHSC1 |
| LRRN3 | MXD3 |  |
| LTA | MYC |  |
| LTB | MYD88 |  |

| ABCB1 | B3GALT6 | CD40 | GSTA4 | IFNA1 | JUND | MELTF |
| --- | --- | --- | --- | --- | --- | --- |
| ABCB1B | BACE1 | CD40LG | GSTK1 | IFNAR1 | KCNH2 | MFNG |
| ABCC1 | BAD | CD44 | GSTP1 | IFNAR2 | KCNMB2 | MGMT |
| ABCC2 | BAK1 | CD55 | H1-10 | IFNB1 | KDR | MIR125A |
| ABCC4 | BAX | CDC14B | H19 | IFNG | KEAP1 | MIR1290 |
| ABCC5 | BBC3 | CDC20 | H2AX | IFNK | KLF10 | MIR146A |
| ABCG1 | BCL10 | CDC25C | H2BC26 | IGF1 | KLF6 | MIR19A |
| ABCG2 | BCL2 | CDH1 | H2BC5 | IGF1R | KLHL21 | MIR21 |
| ABL | BCL2A1 | CDH11 | H4C11 | IGF2 | KLHL24 | MIR22 |
| ACACA | BCL2L1 | CDH17 | H4C15 | IGFBP1 | KLK2 | MIR222 |
| ACKR3 | BCL2L11 | CDK1 | HBS1L | IGFBP2 | KLK3 | MIR223 |
| ADAM17 | BCL2L2 | CDK2 | HCK | IGFBP3 | KMT5A | MIR22HG |
| ADAMTS4 | BCL3 | CDK4 | HDAC1 | IGFBP4 | KRAS | MIR27A |
| ADCY9 | BCOR | CDK5 | HDAC11 | IGFBP5 | KRTAP2-1 | MIR27B |
| AGR2 | BECN1 | CDK6 | HDAC2 | IGFBP7 | KYNU | MIR30A |
| AHR | BID | CDK7 | HDAC3 | IGLL1 | LCP2 | MIR99A |
| AK1 | BIRC2 | CDK9 | HDAC4 | IKBKB | LDLR | MKI67 |
| AKAP6 | BIRC3 | CDKN1A | HDAC6 | IKBKG | LIG3 | MME |
| AKT1 | BIRC5 | CDKN1B | HDAC8 | IL10 | LIG4 | MMP10 |
| AKT2 | BIRC7 | CDKN2A | HGF | IL12A | LPAR1 | MMP13 |
| ALCAM | CASP1 | CFLAR | HIF1A | IL12B | LRRN3 | MMP14 |
| ALDH1A1 | CASP2 | CFTR | HLA-DPB2 | IL18 | LTA | MMP2 |
| ALDOA | CASP3 | CHEK1 | HMGCR | IL1B | LTB | MMP3 |
| ALDOC | CASP4 | CHEK2 | HMOX1 | IL2 | LTBR | MMP7 |
| ANKRD37 | CASP7 | CHUK | HNRNPA1 | IL6 | MAP1LC3B | MMP9 |
| ANKRD50 | CASP8 | CLCN6 | HNRNPD | INSIG2 | MAP2K1 | MPHOSPH6 |
| ANKZF1 | CASP9 | COL2A1 | HOXB5 | INSR | MAP2K2 | MPO |
| APC | CAT | COL4A1 | HPRT1 | IRAG2 | MAP2K3 | MRPL1 |
| APP | CBR1 | COL4A5 | HSF1 | IRAK1 | MAP2K4 | MS4A1 |
| AQP3 | CCAR1 | CREBBP | HSP90AA1 | IRAK2 | MAP3K1 | MSR1 |
| AR | CCL2 | CSF1 | HSP90B1 | IRF5 | MAPK1 | MST1R |
| ARHGAP30 | CCN2 | CSF1R | HSPA1A | IRS1 | MAPK12 | MTOR |
| ARNT | CCNA2 | CTNNB1 | HSPA4 | ITGAM | MAPK14 | MVD |
| ATF1 | CCNB1 | CTSB | HSPA5 | ITGB1 | MAPK3 | MXD1 |
| ATF2 | CCND1 | CTSD | HSPD1 | IVL | MAPK8 | MXD3 |
| ATF3 | CCND3 | CXCL1 | ICAM1 | JAK2 | MAPK9 | MYC |
| ATF6 | CCNE1 | CXCL12 | ID1 | JAK3 | MAPT | MYD88 |
| ATM | CCPG1 | CXCL2 | ID2 | JSRP1 | MCM7 | MYL12A |
| AURKA | CD14 | CXCL8 | ID3 | JUN | MDM2 |  |
| AURKB | CD36 | GSK3B | IDO1 | JUNB | MECP2 |  |
| STITCH | | | | | | |

| ABCB1 | ANKRD50 | BCL2A1 | CCPG1 | CLCN6 | GSK3B | HSP90AA1 | IGLL1 | KDM1A | MAP2K1 | MS4A1 | PTEN |
| --- | --- | --- | --- | --- | --- | --- | --- | --- | --- | --- | --- |
| ABCC1 | ANKZF1 | BCL2L1 | CD14 | COL2A1 | GSR | HSP90B1 | IKBKB | KDR | MAP2K2 | MSMP | PTGS2 |
| ABCC2 | ANPEP | BCL2L11 | CD36 | COL4A1 | GSTA4 | HSPA1A | IKBKG | KEAP1 | MAP2K3 | MSR1 | RAPGEF3 |
| ABCC4 | ANXA5 | BCL2L2 | CD4 | COL4A5 | GSTK1 | HSPA4 | IL10 | KLF10 | MAP2K4 | MST1R | RAPGEF4 |
| ABCC5 | APC | BCL3 | CD40 | CREBBP | GSTP1 | HSPA5 | IL12A | KLF6 | MAP3K1 | MTOR | RELA |
| ABCG1 | APOBEC3F | BCOR | CD40LG | CRP | H1FX | HSPB1 | IL12B | KLHL21 | MAPK1 | MVD | SERPINB10 |
| ABCG2 | APOBEC3G | BDNF | CD44 | CSF1 | H2AFX | HSPD1 | IL17A | KLHL24 | MAPK12 | MXD1 | SETD8 |
| ABHD5 | APP | BECN1 | CD55 | CSF1R | HBS1L | HSPE1 | IL18 | KLK2 | MAPK14 | MXD3 | SHBG |
| ABL1 | AQP3 | BID | CDC14B | CTCFL | HCK | HTT | IL1B | KLK3 | MAPK3 | MYC | SIRT1 |
| ACACA | AR | BIRC2 | CDC20 | CTGF | HDAC1 | ICAM1 | IL2 | KMT2A | MAPK8 | MYD88 | SNCA |
| ACHE | ARHGAP30 | BIRC3 | CDC25C | CTNNB1 | HDAC11 | ID1 | IL4 | KPNB1 | MAPK9 | MYL12A | SNUPN |
| ACKR3 | ARNT | BIRC5 | CDH1 | CTSB | HDAC2 | ID2 | IL6 | KRAS | MAPT | NFE2L2 | SOD2 |
| ADAM17 | ATF1 | BIRC7 | CDH11 | CTSD | HDAC3 | ID3 | INS | KRTAP2-1 | MCM7 | NFKB1 | STAT3 |
| ADAMTS4 | ATF2 | CASP1 | CDH17 | CXCL1 | HDAC4 | IDO1 | INSIG2 | KYNU | MDM2 | NFKBIA | TLR4 |
| ADCY9 | ATF3 | CASP2 | CDK1 | CXCL12 | HDAC6 | IFNA1 | INSR | LCP2 | MECP2 | NLRP3 | TNF |
| AGR2 | ATF6 | CASP3 | CDK2 | CXCL2 | HDAC8 | IFNAR1 | IRAK1 | LDHB | MFI2 | NOS2 | TNK1 |
| AHR | ATM | CASP4 | CDK4 | CXCL8 | HGF | IFNAR2 | IRAK2 | LDLR | MFNG | NOTCH1 | TP53 |
| AK1 | ATP2A2 | CASP7 | CDK5 | CYP1B1 | HIF1A | IFNB1 | IRF5 | LIG3 | MGMT | NQO1 | TSG101 |
| AKAP6 | ATP2A3 | CASP8 | CDK6 | CYP3A4 | HIST1H2BD | IFNG | IRS1 | LIG4 | MKI67 | PAK1 | TYR |
| AKT1 | AURKA | CASP9 | CDK7 | DYRK2 | HIST1H4F | IFNK | ITGAM | LIN28B | MME | PARP1 | VDR |
| AKT2 | AURKB | CAT | CDK9 | EGF | HMGCR | IFNLR1 | ITGB1 | LMNA | MMP10 | PCNA | VEGFA |
| ALB | B3GALT6 | CBR1 | CDKN1A | EGFR | HMOX1 | IGF1 | IVL | LPAR1 | MMP13 | PIK3C3 | VIM |
| ALCAM | BACE1 | CCAR1 | CDKN1B | EP300 | HNRNPA1 | IGF1R | JAK2 | LRMP | MMP14 | PIK3CA | WHSC1 |
| ALDH1A1 | BAD | CCK | CDKN2A | ERBB2 | HNRNPD | IGF2 | JAK3 | LRRN3 | MMP2 | PIN1 |  |
| ALDOA | BAK1 | CCL2 | CFLAR | ERG | HOXB5 | IGFBP1 | JSRP1 | LTA | MMP3 | PLIN1 | **String** |
| ALDOC | BAX | CCNA2 | CFTR | F7 | HPGD | IGFBP2 | JUN | LTB | MMP7 | PLIN5 |
| ALOX12 | BBC3 | CCNB1 | CHEK1 | GFAP | HPGDS | IGFBP3 | JUNB | LTBR | MMP9 | PPARG |
| ALOX15B | BCHE | CCND1 | CHEK2 | GLO1 | HPRT1 | IGFBP4 | JUND | MAOA | MPHOSPH6 | PRKAA2 |
| ANG | BCL10 | CCND3 | CHUK | GMNN | HSD17B2 | IGFBP5 | KCNH2 | MAOB | MPO | PRKCQ |
| ANKRD37 | BCL2 | CCNE1 | CISD1 | GPT | HSF1 | IGFBP7 | KCNMB2 | MAP1LC3B | MRPL1 | PSMB5 |

**Supplementary Table 2**

Parkinson Relevant targets from OMIM database ,DisGeNET database and GEO database.

| BDNF | OMIM database |
| --- | --- |
| CASP7 |
| CCK |
| CTNNB1 |
| DRD4 |
| GLB1 |
| GSTO1 |
| GSTP1 |
| PRKCD |
| PROS1 |
| RIC3 |
| SMPD1 |
| TRAF6 |
| TRAK1 |
| UQCRC1 |

| A2M | ANG | | BCKDK | | CDK5 | DisGeNET |
| --- | --- | --- | --- | --- | --- | --- |
| ABCA7 | ANKK1 | | BCL2 | | CDK5R1 |
| ABCB1 | APAF1 | | BDNF | | CDKN2A |
| ABL1 | APEX1 | | BECN1 | | CDKN2D |
| ACACA | APLN | | BIN3 | | CDNF |
| ACE | APOA1 | | BMS1 | | CEACAM6 |
| ACHE | APOB | | BNIP3L | | CEBPB |
| ACMSD | APOD | | BPIFA2 | | CFP |
| ACOT7 | APOE | | BRINP1 | | CHAT |
| ACPP | APP | | BST1 | | CHCHD10 |
| ACTB | APRT | | C10orf2 | | CHCHD2 |
| ACTBL2 | AQP4 | | C10orf32 | | CHM |
| ACTG1 | ARC | | C17orf47 | | CHMP2B |
| ACTG2 | ARL6IP5 | | C18orf8 | | CHP1 |
| ADAMTSL1 | ARNTL | | C19orf12 | | CHRM3 |
| ADARB2 | ARPC3 | | C9orf72 | | CHRNA4 |
| ADCY5 | ARSA | | CA8 | | CHRNA5 |
| ADCYAP1 | ASAH1 | | CAB39L | | CISD1 |
| ADCYAP1R1 | ASCL1 | | CACNA1A | | CIT |
| ADH1B | ASXL1 | | CALB1 | | CLK1 |
| ADH1C | ATAD1 | | CALCA | | CLOCK |
| ADH4 | ATF2 | | CAPN1 | | CLU |
| ADH7 | ATF4 | | CARD16 | | CNKSR3 |
| ADORA2A | ATG12 | | CASP1 | | CNNM2 |
| ADRB2 | ATG13 | | CASP3 | | CNR1 |
| ADRBK1 | ATG5 | | CASP9 | | CNR2 |
| ADRBK2 | ATG7 | | CAST | | CNTN1 |
| AFF2 | ATM | | CAT | | CNTNAP2 |
| AGAP1 | ATOX1 | | CAV1 | | COASY |
| AGER | ATP13A2 | | CBSL | | COL11A2 |
| AGFG1 | ATP1A3 | | CCDC62 | | COL13A1 |
| AGT | ATP6AP2 | | CCDC82 | | COL17A1 |
| AGTR1 | ATXN2 | | CCK | | COL19A1 |
| AHR | ATXN3 | | CCKAR | | COL5A2 |
| AHSA1 | AVP | | CCL2 | | COMT |
| AIF1 | AXIN2 | | CCL5 | | COQ2 |
| AIMP2 | B3GALT4 | | CCR2 | | COX10 |
| AKR1A1 | BACE1 | | CD19 | | COX8A |
| AKR1B1 | BAG1 | | CD200 | | CP |
| AKT1 | BAG3 | | CD200R1 | | CREB1 |
| ALB | BAG5 | | CD2AP | | CRHR1 |
| ALDH1A1 | BAP1 | | CD38 | | CRK |
| ALDH2 | BAX | | CD55 | | CRMP1 |
| ALOX5 | BCHE | | CDH8 | | CRP |
| CRY1 | DLG2 | ESR1 | | | GALC | DisGeNET |
| CRYZ | DLG4 | ESR2 | | | GAP43 |
| CSF2 | DMRT1 | F2 | | | GAPDH |
| CSF3 | DNAJB1 | F2R | | | GBA |
| CST3 | DNAJB6 | F9 | | | GBF1 |
| CTGF | DNAJC1 | FAAH | | | GC |
| CTIF | DNAJC12 | FABP3 | | | GCG |
| CTNNA3 | DNAJC13 | FAF1 | | | GCH1 |
| CTNNB1 | DNAJC5 | FAM47E | | | GDF15 |
| CTSB | DNAJC6 | FAM47E-STBD1 | | | GDF5 |
| CTSC | DNER | FAS | | | GDNF |
| CTSD | DNM1L | FASLG | | | GFAP |
| CTSL | DNM3 | FBP1 | | | GIF |
| CUX1 | DNMT1 | FBRS | | | GIG25 |
| CX3CL1 | DNMT3B | FBXO7 | | | GIGYF2 |
| CX3CR1 | DPEP1 | FBXO8 | | | GIP |
| CXCL12 | DPP4 | FCER2 | | | GJC2 |
| CXCL8 | DPYSL2 | FCGR3A | | | GLA |
| CXCR4 | DRAXIN | FEZ1 | | | GLB1 |
| CYBB | DRD1 | FGB | | | GLP1R |
| CYP17A1 | DRD2 | FGF2 | | | GLRX |
| CYP1A1 | DRD3 | FGF20 | | | GLUD2 |
| CYP1A2 | DRD4 | FHL5 | | | GLUL |
| CYP2B6 | DRD5 | FKBP1A | | | GPNMB |
| CYP2D6 | DYRK1A | FKBP4 | | | GPR143 |
| CYP2E1 | E2F1 | FMR1 | | | GPR37 |
| CYP3A4 | EDN1 | FOSL2 | | | GPR55 |
| CYP4F3 | EEF1A2 | FOXA1 | | | GPR65 |
| DAPK1 | EGF | FOXA2 | | | GPR88 |
| DAPK2 | EGLN1 | FOXO1 | | | GPX1 |
| DBH | EGR1 | FOXO3 | | | GPX4 |
| DBN1 | EHMT1 | FRY | | | GPX7 |
| DCDC2 | EIF2B3 | FST | | | GRAP2 |
| DCTN1 | EIF4G1 | FTH1 | | | GRIA2 |
| DCTN4 | ELAVL2 | FTL | | | GRIN2A |
| DCUN1D1 | ELAVL4 | FTMT | | | GRIN2B |
| DDC | ELK3 | FUS | | | GRIN2D |
| DDIT3 | ENO2 | FXN | | | GRK5 |
| DDIT4 | ENSP00000469970 | FYN | | | GRK6 |
| DDRGK1 | ENSP00000485396 | GABPA | | | GRM2 |
| DECR1 | EPHB1 | GAD1 | | | GRM4 |
| DENR | EPHB2 | GAD2 | | | GRM5 |
| DGKQ | ERCC6L2 | GAK | | | GRN |
| DLG1 | ERG | GAL | | | GRP |
| GSK3B | HSP90AA1 | | ITIH1 | MAG | | DisGeNET |
| GSTA4 | HSPA1A | | ITPKB | MANF | |
| GSTK1 | HSPA4 | | KANSL1 | MAOA | |
| GSTM1 | HSPA5 | | KCNIP4 | MAOB | |
| GSTM2 | HSPA8 | | KCNJ4 | MAP1LC3B | |
| GSTO1 | HSPA9 | | KCNJ6 | MAP2 | |
| GSTO2 | HSPD1 | | KDR | MAP3K13 | |
| GSTP1 | HTR1A | | KEAP1 | MAP3K5 | |
| GTF2H1 | HTR1B | | KHDRBS1 | MAP4K4 | |
| HBG1 | HTR2A | | KHSRP | MAPK1 | |
| HCAR2 | HTRA2 | | KLF4 | MAPK10 | |
| HCLS1 | HTT | | KLHDC1 | MAPK14 | |
| HCN2 | IAPP | | KLK3 | MAPK3 | |
| HCN3 | ICAM1 | | KLK6 | MAPK8 | |
| HCRT | IDE | | KRT7 | MAPT | |
| HDAC4 | IDUA | | LAG3 | MARK2 | |
| HDAC6 | IFNG | | LAMC2 | MC1R | |
| HFE | IGF1 | | LAMP1 | MCAT | |
| HGF | IGF1R | | LAMP2 | MCCC1 | |
| HIF1A | IGF2 | | LAMP3 | MCF2L | |
| HIP1R | IGF2R | | LBP | MCIDAS | |
| HIST1H3J | IGFALS | | LCN2 | MDGA2 | |
| HIVEP3 | IL10 | | LDLR | MEF2C | |
| HK1 | IL13RA1 | | LEP | MEF2D | |
| HK2 | IL17A | | LGALS1 | MEFV | |
| HLA-C | IL18 | | LGALS3 | MFAP1 | |
| HLA-DRA | IL1A | | LGALS4 | MFGE8 | |
| HLA-DRB1 | IL1B | | LHFPL2 | MFHAS1 | |
| HLA-DRB5 | IL1RN | | LIFR | MFN2 | |
| HMGB1 | IL23A | | LILRB1 | MGAM | |
| HMGXB3 | IL2RA | | LIN28B | MGEA5 | |
| HMOX1 | IL2RB | | LINGO1 | MGLL | |
| HMOX2 | IL4 | | LINGO2 | MIDN | |
| HNMT | IL6 | | LMNA | MIF | |
| HNRNPU | IL7 | | LMX1A | MMP3 | |
| HOMER1 | INPP5F | | LMX1B | MMP9 | |
| HOXD13 | INS | | LRP10 | MMRN1 | |
| HP | INSR | | LRP2 | MOK | |
| HPGDS | IP6K2 | | LRPPRC | MPHOSPH6 | |
| HRH3 | IREB2 | | LRRK1 | MPO | |
| HRSP12 | ISG20 | | LRRK2 | MPRIP | |
| HS1BP3 | ISYNA1 | | LSAMP | MPZ | |
| HSD3B7 | ITGA8 | | LY6E | MRC1 | |
| HSF1 | ITGAM | | MACF1 | MSC | |
| MSMB | NOD2 | | PAM | | POU2F1 | DisGeNET |
| MSRA | NOL3 | | PANK2 | | PPARA |
| MTA1 | NOS1 | | PARK2 | | PPARD |
| MT-CO2 | NOS2 | | PARK7 | | PPARG |
| MT-CYB | NOS3 | | PARL | | PPARGC1A |
| MTHFR | NOX1 | | PARP1 | | PPID |
| MTIF3 | NPC1 | | PCNA | | PPIF |
| MT-ND1 | NPY | | PCP4 | | PPIG |
| MT-ND2 | NQO1 | | PDC | | PPP1R1B |
| MT-ND3 | NQO2 | | PDE10A | | PPP1R9B |
| MTOR | NR1I2 | | PDE4A | | PRDX2 |
| MTR | NR3C1 | | PDE8B | | PREP |
| MTRR | NR4A1 | | PDIA3 | | PRKAA1 |
| MUL1 | NR4A2 | | PDSS2 | | PRKAA2 |
| MX2 | NRF1 | | PDYN | | PRKAB1 |
| MZB1 | NRG1 | | PEBP1 | | PRKAR2A |
| NAT2 | NRGN | | PENK | | PRKD1 |
| NCAPG2 | NRTN | | PGP | | PRNP |
| NCL | NSF | | PHOX2B | | PROKR2 |
| NCS1 | NT5E | | PICALM | | PRRX2 |
| NDFIP1 | NTF3 | | PIK3CA | | PRSS21 |
| NDUFA1 | NTRK2 | | PIK3CB | | PRSS53 |
| NDUFA2 | NTS | | PIK3CD | | PSAP |
| NDUFAF2 | NUCB2 | | PIK3CG | | PSEN1 |
| NDUFS3 | NUCKS1 | | PIN1 | | PSEN2 |
| NDUFS4 | NUP62 | | PINK1 | | PSIP1 |
| NDUFV2 | OGDH | | PITX3 | | PSMB8 |
| NEDD4 | OGG1 | | PLA2G1B | | PSMC4 |
| NEDD9 | OPN1MW2 | | PLA2G6 | | PSPH |
| NEFL | OPN4 | | PLB1 | | PSPN |
| NEFM | OPRL1 | | PLD2 | | PTBP1 |
| NELFE | OPTN | | PLEKHM1 | | PTEN |
| NES | P2RX1 | | PLK2 | | PTGS2 |
| NEUROG2 | P2RX2 | | PLPPR1 | | PTK2B |
| NFE2L2 | P2RX3 | | PLXNA2 | | PTN |
| NFKB1 | P2RX4 | | PM20D1 | | PTPN22 |
| NGF | P2RX5 | | PNOC | | PTPRA |
| NGFR | P2RX6 | | POLB | | PTPRC |
| NHS | P2RX7 | | POLDIP2 | | PVALB |
| NIF3L1 | P2RY1 | | POLG | | PVRL2 |
| NLRP1 | P2RY2 | | POMC | | RAB10 |
| NLRP3 | PACRG | | PON1 | | RAB1A |
| NMS | PAEP | | PON2 | | RAB29 |
| NNMT | PAFAH1B1 | | POTEM | | RAB32 |
| RAB39B | SCLY | | SLC6A4 | | SYT11 | DisGeNET |
| RAB4A | SCN2A | | SLC8A1 | | SYT17 |
| RAB7A | SELT | | SLCO6A1 | | SYVN1 |
| RAB7B | SEMA5A | | SMARCA1 | | TAC1 |
| RABEP2 | SEMA6A | | SMN1 | | TAL1 |
| RAC1 | SESN2 | | SMN2 | | TALDO1 |
| RAI1 | SESN3 | | SMPD1 | | TARDBP |
| RBM3 | SF3B1 | | SMUG1 | | TAS2R13 |
| REG1A | SGCA | | SNAP25 | | TBC1D5 |
| REM1 | SGSM3 | | SNCA | | TBC1D9 |
| REN | SGTA | | SNCAIP | | TBP |
| RENBP | SH3GL2 | | SNCB | | TCEANC2 |
| REST | SHC3 | | SNCG | | TCF3 |
| RET | SHMT1 | | SNRNP70 | | TCL1B |
| RFC1 | SHMT2 | | SNRPF | | TCOF1 |
| RHOT1 | SI | | SOAT1 | | TET1 |
| RIC3 | SIAH1 | | SOD1 | | TET2 |
| RIPK1 | SIGLEC7 | | SOD2 | | TFAM |
| RIPK3 | SIGMAR1 | | SOD3 | | TFEB |
| RIT2 | SIPA1L2 | | SOX4 | | TFR2 |
| RMDN1 | SIRT1 | | SP1 | | TFRC |
| RMDN2 | SIRT2 | | SPG7 | | TGFB1 |
| RMDN3 | SIRT3 | | SPHK1 | | TGFB2 |
| RNASE1 | SKIL | | SPP1 | | TGM2 |
| RNASE4 | SKP1 | | SPPL2C | | TH |
| RNF11 | SLC11A2 | | SPR | | THY1 |
| RNF146 | SLC16A1 | | SPTSSB | | TIMP2 |
| RNF19A | SLC17A6 | | SQSTM1 | | TIMP3 |
| RNF41 | SLC18A2 | | SREBF1 | | TLN1 |
| ROCK2 | SLC18A3 | | SRRM2 | | TLR2 |
| ROS1 | SLC1A2 | | SST | | TLR4 |
| RPL14 | SLC22A1 | | ST3GAL2 | | TLR9 |
| RPL23A | SLC25A27 | | STAT3 | | TMC3 |
| RPL6 | SLC2A13 | | STBD1 | | TMED10 |
| RPS27A | SLC2A14 | | STH | | TMED9 |
| RPS8 | SLC2A9 | | STK39 | | TMEM106B |
| RREB1 | SLC30A10 | | STX1B | | TMEM163 |
| RRN3 | SLC40A1 | | STXBP3 | | TMEM175 |
| RTN4R | SLC41A1 | | SUCLA2 | | TMEM229B |
| S100B | SLC45A3 | | SV2C | | TMEM230 |
| SBNO1 | SLC50A1 | | SYBU | | TMEM55A |
| SBNO2 | SLC52A2 | | SYNJ1 | | TMPRSS9 |
| SCARB2 | SLC6A2 | | SYNM | | TNF |
| SCD | SLC6A3 | | SYP | | TNFRSF1B |
| TNK2 | VCAM1 | | DisGeNET | | | |
| TOMM20 | VCP | |
| TOMM40 | VDAC1 | |
| TOR1A | VDR | |
| TP53 | VEGFA | |
| TPH2 | VIM | |
| TPM1 | VIPR2 | |
| TPO | VPS13C | |
| TPPP | VPS26A | |
| TPTE2 | VPS35 | |
| TRAF2 | VPS41 | |
| TRAP1 | WASH1 | |
| TRAT1 | WBP1L | |
| TREM2 | WNT1 | |
| TRH | WNT3 | |
| TRIB3 | XBP1 | |
| TRIM27 | XPR1 | |
| TRIM32 | YWHAE | |
| TRPC1 | YWHAZ | |
| TRPM2 | ZC3H7B | |
| TRPM7 | ZFPM1 | |
| TRPV1 | ZGLP1 | |
| TSC2 | ZNF165 | |
| TSPO | ZNF184 | |
| TTR | ZNF645 | |
| TXN | ZNF646 | |
| TXNIP | ZNF746 | |
| TXNRD3 | ZP3 | |
| TYR |  | |
| TYW1B |  | |
| UBB |  | |
| UBC |  | |
| UBE2K |  | |
| UBE2L3 |  | |
| UCHL1 |  | |
| UCHL3 |  | |
| UCP2 |  | |
| ULK1 |  | |
| UNC13C |  | |
| USP1 |  | |
| USP15 |  | |
| USP24 |  | |
| USP40 |  | |
| UTRN |  | |

| AASDHPPT | CYP2E1 | MCCC1 | SHISA6 | GEO |
| --- | --- | --- | --- | --- |
| ACRV1 | DDX19A | MCM5 | SLC38A2 |
| ACTR2 | DDX3X | MFN1 | SLC5A1 |
| AMPD3 | DHCR7 | MGAT2 | SMARCE1 |
| ANKS1A | DIO2 | MTF2 | SRPRB |
| ANXA6 | DNASE2 | MUC16 | ST13 |
| AP3B2 | DOHH | MYB | STAT6 |
| ARHGAP17 | DPYSL4 | MYO6 | SYNCRIP |
| ARL8B | ECHDC1 | MYRF | TENM1 |
| ARMC9 | EIF2AK1 | NAAA | TLX2 |
| ASB4 | EIF3J | NAB2 | TMCC1 |
| ATP6V1H | ELAVL1 | NARS2 | TNFAIP8 |
| ATP8A1 | ENSP00000480348 | NAT8 | TRPV6 |
| C2 | ERMAP | NSUN5 | TXLNA |
| C2CD2 | ESR1 | NUDT4 | UBE2J1 |
| C7orf26 | FAM168B | PBX2 | UBE2K |
| CAMSAP1 | FBXO9 | PDE6D | UBOX5 |
| CAPZA2 | FGF17 | PDHX | UBXN4 |
| CASP8AP2 | FGF2 | PDS5A | UPF2 |
| CASP9 | FNBP4 | PDSS2 | URI1 |
| CCAR2 | FPR3 | PEX10 | VDR |
| CCIN | FUBP1 | PGF | WSB2 |
| CCL7 | FUT6 | PHF1 | XRCC4 |
| CCZ1B | GATA2 | PHKG2 | XYLT2 |
| CD1E | GCGR | PI15 | ZBTB7A |
| CDC25C | GIMAP5 | PI4KB | ZFC3H1 |
| CDC42BPA | GLUD2 | PLLP | ZNF155 |
| CDC42EP4 | GPLD1 | PML | ZNF277 |
| CDRT1 | GSAP | PMPCB | ZNF407 |
| CEACAM4 | HAUS2 | PRB4 | ZNF556 |
| CELSR3 | HFE | PRPF38B |  |
| CFLAR | HNRNPH3 | PRR3 |  |
| CHD1L | HSPD1 | PSIP1 |  |
| CLEC2D | IER3IP1 | R3HDM2 |  |
| CLIP4 | IFI27 | RAB11A |  |
| CLTB | ITCH | RAB17 |  |
| COLEC10 | KLF9 | RABEP2 |  |
| CPVL | KLHL22 | RAP2B |  |
| CSE1L | KRAS | RBM15 |  |
| CSF2RA | KRIT1 | RIPK4 |  |
| CTSZ | LONP2 | RTCA |  |
| CUL5 | LSM7 | RYBP |  |
| CXCR2 | MAGEA1 | SDHB |  |
| CYP2C8 | MAP2K7 | SEPW1 |  |
